# Supplementary material for: Red room temperature phosphorescence of lead halide based coordination polymer showing efficient angle-dependent polarized emission and photoelectric performance
Source: Royal Society of Chemistry journal article supplement (doi:10.1039/d2dt01196d), 2022-01-01
Supplement: d2dt01196d1.pdf [file d2dt01196d1.pdf]

## Supporting Information

### **Red room temperature phosphorescence of lead halide based coordination polymer showing efficient angle-dependent polarized emission and photoelectric performance**

Xu-Ke Tian,<sup>a,b</sup> Ji-Rui Zhang,<sup>b</sup> Meng-Yao Wen,<sup>b</sup> Zi-Han Liu,<sup>b</sup> Jia-hui Guo,<sup>b</sup> Cheng-Yu Ma,<sup>b</sup> Hao-Yi Zhang,<sup>b</sup> Xiao-Gang Yang,<sup>\*b</sup> and Lu-Fang Ma<sup>a,b</sup>

<sup>a</sup> College of Chemistry and Chemical Engineering, Henan Normal University, Xinxiang, 453007, P. R. China.

<sup>b</sup> College of Chemistry and Chemical Engineering, Luoyang Normal University, Henan Province Function-Oriented Porous Materials Key Laboratory, Luoyang 471934, P. R. China.

\*Corresponding author: yxg2233@126.com.

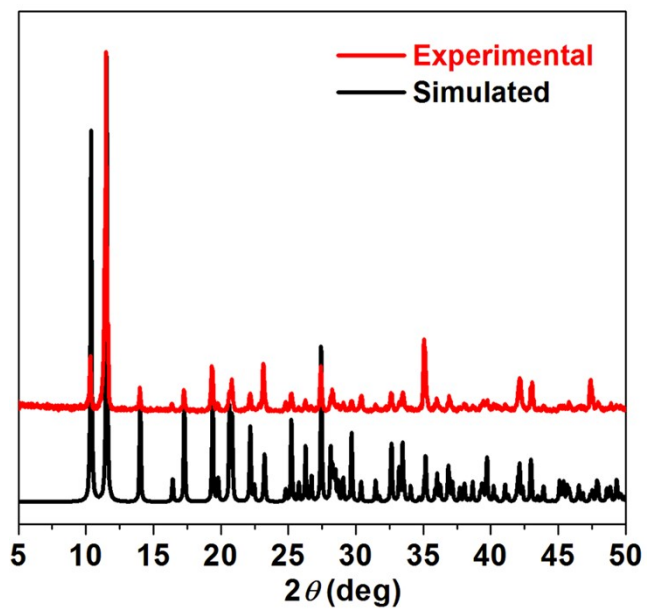

**Figure S1.** Simulated and experimental PXRD patterns of complex **1**.

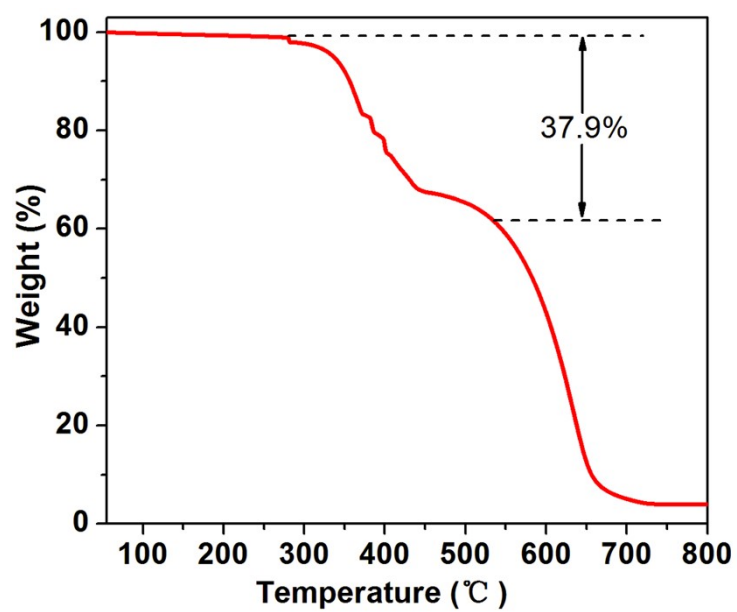

**Figure S2.** Thermo gravimetric analysis (TGA) curve of complex 1.

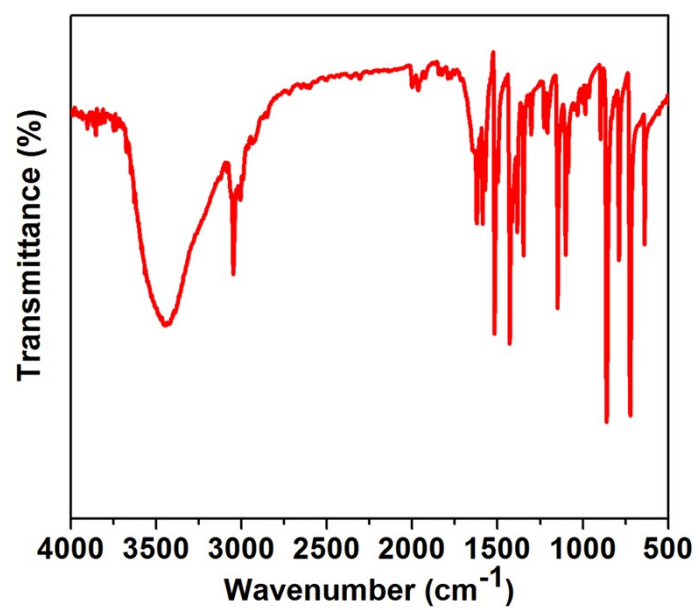

**Figure S3.** FT-IR spectrum of complex 1.

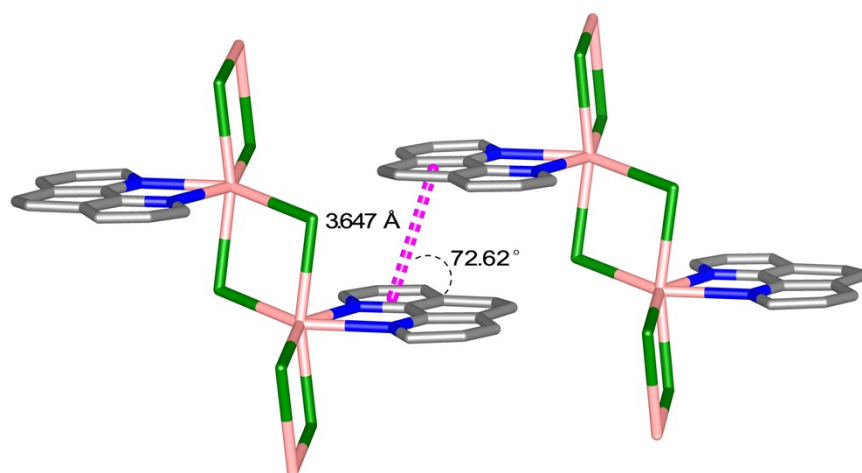

(a)

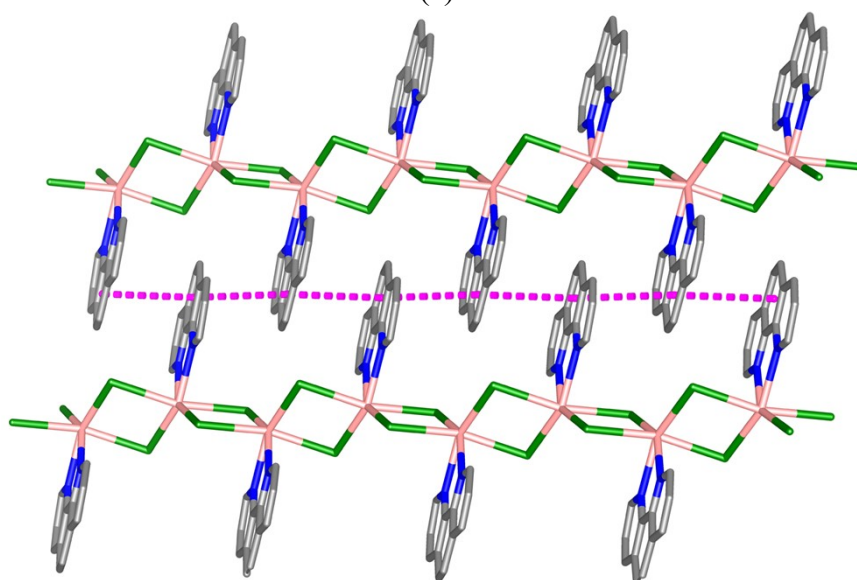

(b)

**Figure S4.** Detailed (a) and overall (b) view of dense  $\pi \cdots \pi$  stacking between phen ligands with H-aggregated arrangement in complex **1**.

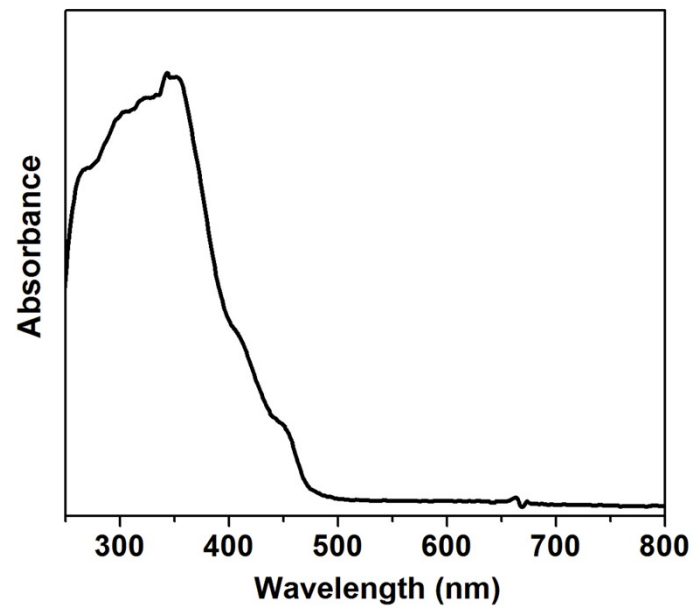

**Figure S5.** UV-vis absorption spectrum of complex **1** in solid state.

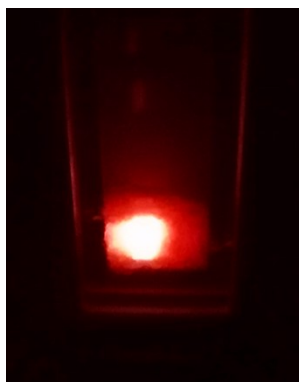

**Figure S6.** Photograph of the solid sample of **1** under and UV (365 nm) light.

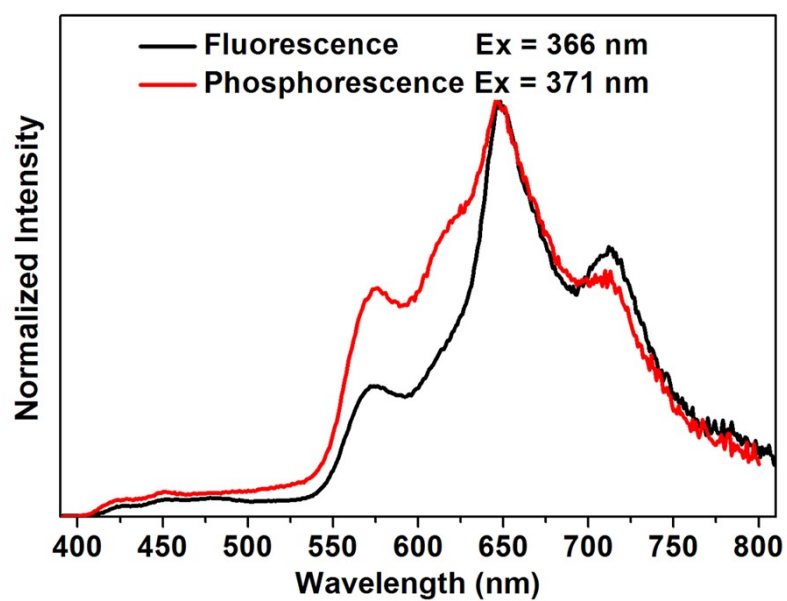

**Figure S7.** Normalized fluorescence (black) and phosphorescence (red) spectra of **1** in solid state measured at room temperature.



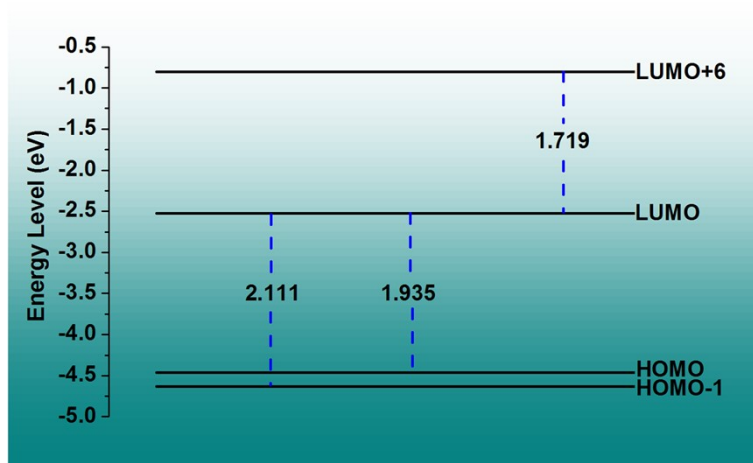

**Figure S8.** The calculated energy levels and energy gaps for selected molecular orbitals of **1**.

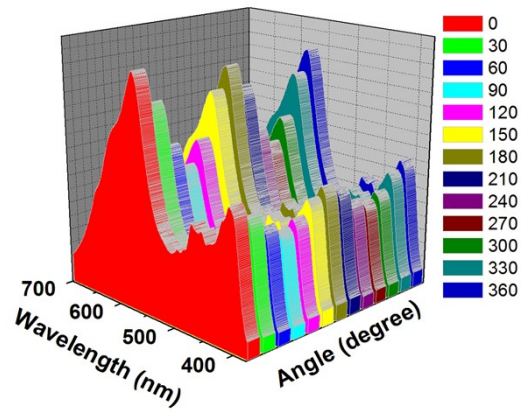

(a)

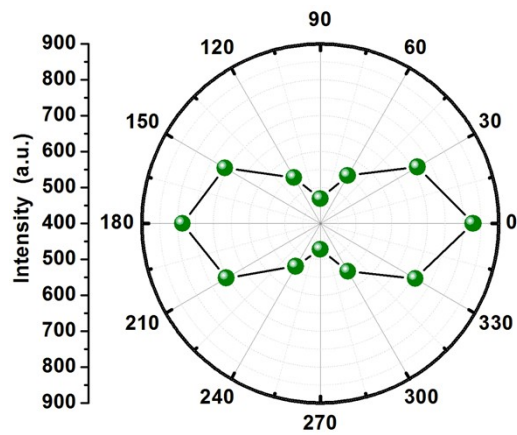

(b)

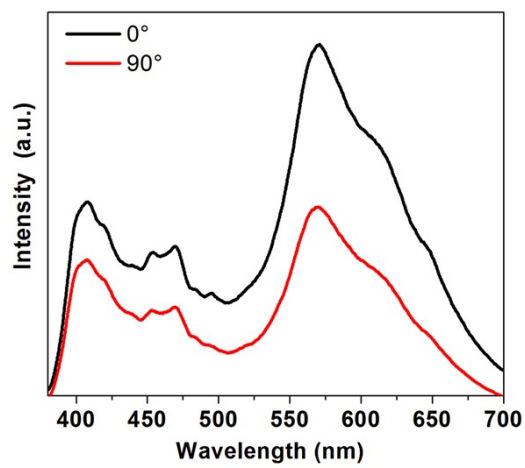

(c)

**Figure S9.** (a) 3D view of angle-dependent fluorescence emission of the CP based film. (c) Fluorescence intensity of the film as a function of the polarized angle. (d) fluorescence spectra of the film measured at a polarized angle of 0 and 90°.

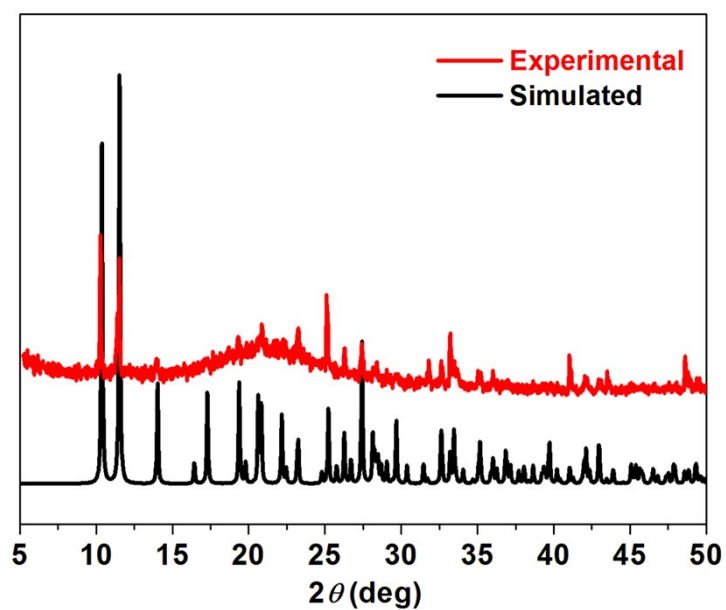

**Figure S10.** Simulated and experimental PXRD patterns of complex **1** after long-term photoelectronic measurements.
